# Supplementary material for: Developmental and Environmental Regulation of Aquaporin Gene Expression across Populus Species: Divergence or Redundancy?
Source: PLoS One. 2013 Feb 5;8(2):e55506. doi: 10.1371/journal.pone.0055506 (PMC3564762; doi:10.1371/journal.pone.0055506)
Supplement: Table S2 — Number of probe sets per AQP member. (XLS) [file pone.0055506.s010.xls]

## Sheet: TableS2
Gene	Number of Probe sets
PtNIP1;5	0
PtNIP1;1	1
PtNIP1;3	1
PtNIP1;4	1
PtNIP2;1	1
PtNIP3;1	1
PtNIP3;2	1
PtNIP3;5	1
PtPIP1;1	1
PtPIP1;5	1
PtPIP2;3	1
PtPIP2;5	1
PtPIP2;6	1
PtPIP2;8	1
PtSIP1;1	1
PtSIP1;3	1
PtSIP1;4	1
PtSIP2;1	1
PtSIP2;2	1
PtTIP1;1	1
PtTIP1;6	1
PtTIP2;1	1
PtTIP2;3	1
PtTIP2;4	1
PtTIP3;2	1
PtTIP4;1	1
PtTIP5;1	1
PtTIP5;2	1
PtXIP1;3	1
PtXIP1;4	1
PtXIP1;5	1
PtXIP2;1	1
PtNIP1;2	2
PtPIP1;4	2
PtPIP2;7	2
PtTIP1;2	2
PtTIP1;3	2
PtTIP1;4	2
PtTIP1;7	2
PtTIP2;2	2
PtTIP3;1	2
PtXIP1;2	2
PtNIP3;4	3
PtPIP1;2	3
PtPIP1;3	3
PtPIP2;2	3
PtPIP2;9	3
PtPIP2;10	3
PtSIP1;2	3
PtTIP1;5	3
PtTIP1;8	3
PtNIP3;3	4
PtPIP2;1	6
PtPIP2;4	6
	94
